# Supplementary material for: Age-related cytokine imbalance in the thymus in sudden infant death syndrome (SIDS)
Source: PubMed Central journal article supplement (PMC10920197; doi:10.1038/s41390-023-02809-6), 2023-09-07
Supplement: 41390_2023_2809_MOESM1_ESM.pdf [file 41390_2023_2809_MOESM1_ESM.pdf]

## Age-related cytokine imbalance in the thymus in sudden infant death syndrome (SIDS)

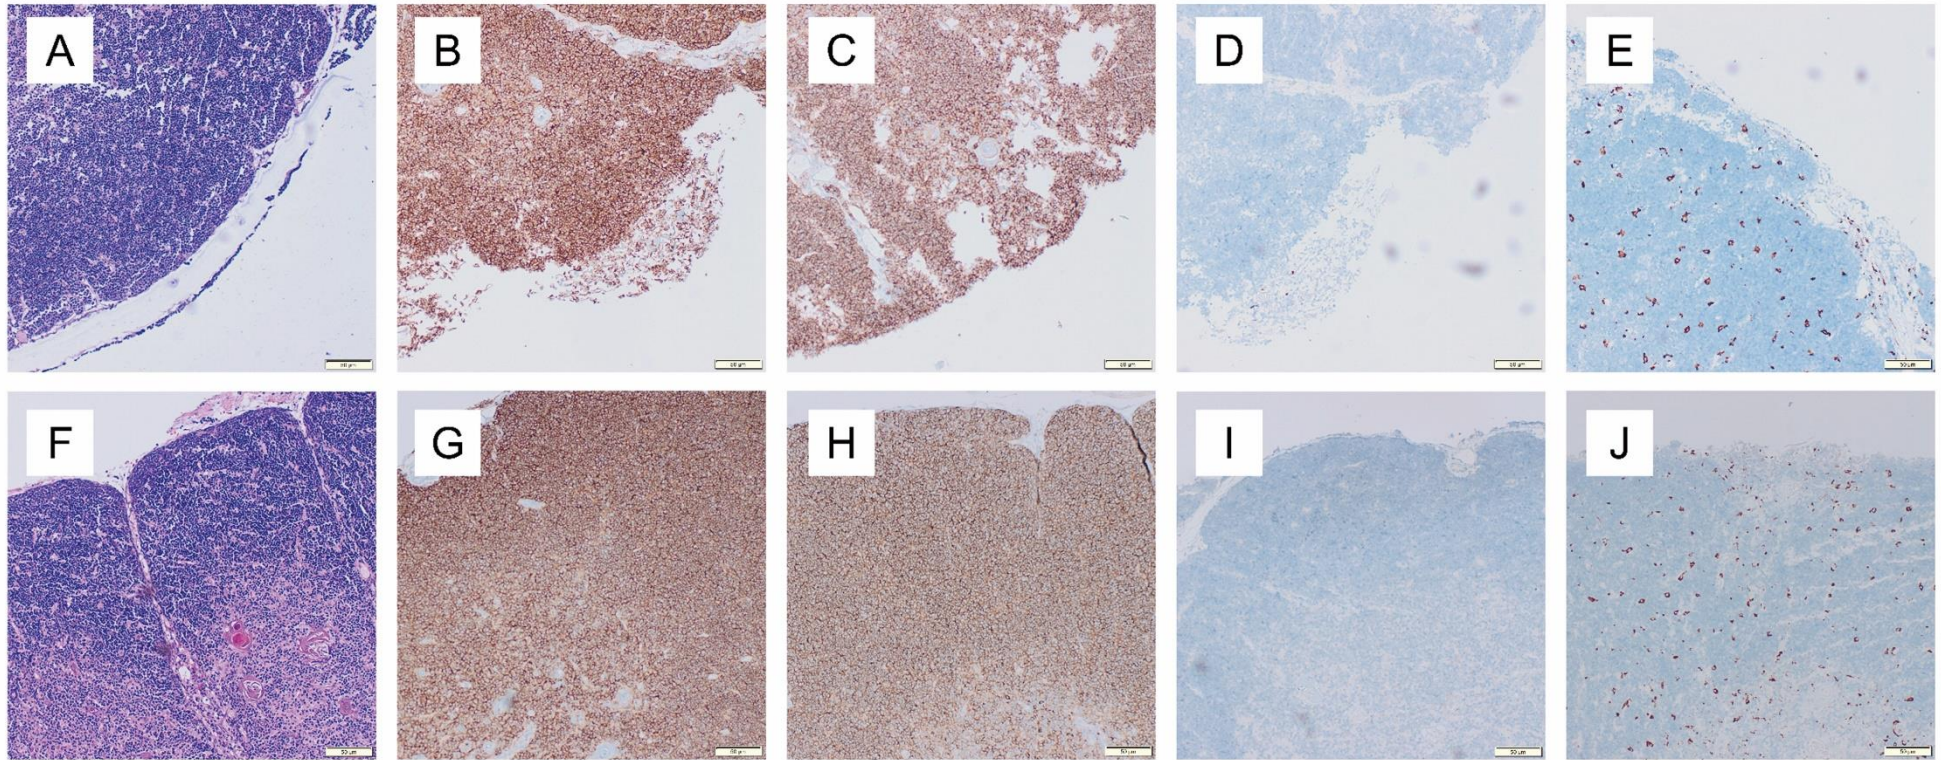

**Supplemental Figure S1** Histological staining of thymic tissue of a SIDS case (A-E) and a control case (F-J). A, F: HE-staining; B, G: CD4-staining; C, H: CD8-staining; D, I: CD138-staining; E, J: PGM-1-staining.
